# Supplementary material for: Controlling the morphology and property of carbon fiber/polyaniline composites for supercapacitor electrode materials by surface functionalization
Source: Royal Society of Chemistry journal article supplement (doi:10.1039/c5ra22208g), 2016-01-01
Supplement: c5ra22208g1.pdf [file c5ra22208g1.pdf]

## Electronic Supplementary Information

# Controlling the Morphology and Property of Carbon Fiber/Polyaniline Composites for Supercapacitor Electrode Materials by Surface Functionalization

*FuyouKe, Jun Tang, ShanyiGuang, Hongyao Xu\**

College of Material Science and Engineering & State Key Laboratory for Modification of Chemical Fibers and Polymer Materials, Donghua University, Shanghai 201620, China.

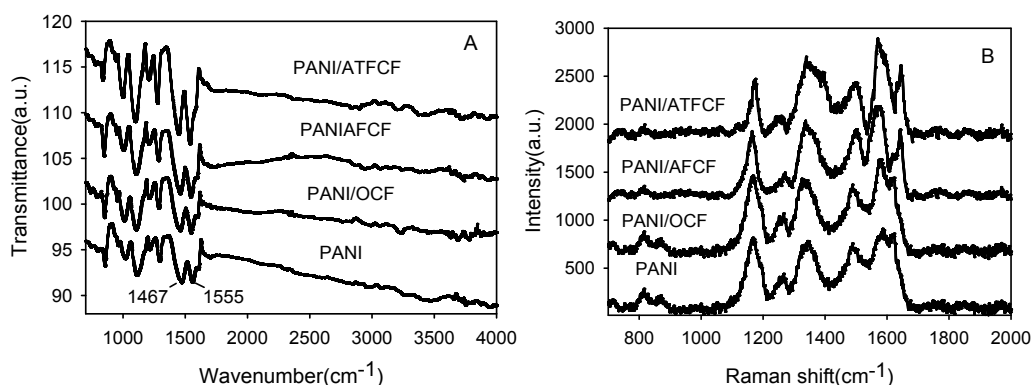

Figure S1 (A) FTIR spectra and (B) Raman spectra of PANI and PANI/CF composite materials.

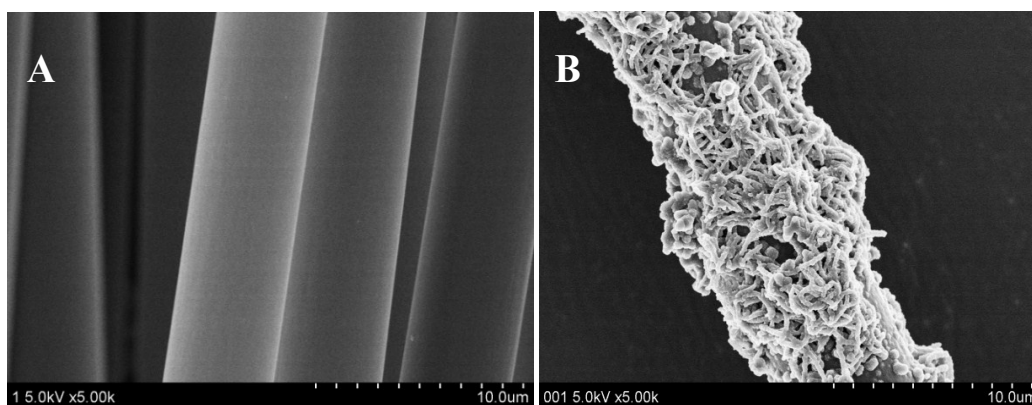

Figure S2 SEM images of carbon fiber (A) and PANI/CF (B).

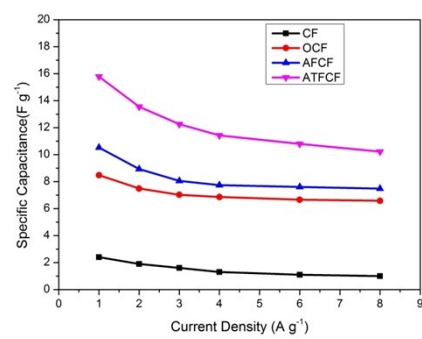

Figure S3 Specific capacitance of CFs at various current densities.
